# Supplementary material for: Meneco, a Topology-Based Gap-Filling Tool Applicable to Degraded Genome-Wide Metabolic Networks
Source: PubMed Central journal article supplement (PMC5302834; doi:10.1371/journal.pcbi.1005276), 2017-01-27
Supplement: pcbi.1005276.s001.pdf [file pcbi.1005276.s001.pdf]

**Table 1.** Main characteristics of a panel of gap-filling methods

| Name                          | Input data                                                                      | Technological platform    | Application models                                                                                                                                              |
|-------------------------------|---------------------------------------------------------------------------------|---------------------------|-----------------------------------------------------------------------------------------------------------------------------------------------------------------|
| <b>GapFill</b> [1]            | Target metabolites                                                              | GAMS platform             | <i>Escherichia coli</i> strains,<br><i>Gordonia alkanivorans</i> [2]<br><i>Salmonella Typhimurium LT2</i> [3]<br><i>Clostridium beijerinckii NCIMB 8052</i> [4] |
| <b>FastGapFill</b> [5]        | Target metabolites                                                              | Matlab & Cplex            | <i>E. coli</i> [5]<br><i>Synechocystis sp.</i> [5]                                                                                                              |
| <b>Meneco</b>                 | Target metabolites                                                              | Python                    | <i>Ectocarpus siliculosus</i> [6]<br><i>Candidatus Phaeomarinobacter ectocarpi</i> [7]                                                                          |
| <b>Christian et al.</b> [8]   | Target metabolites<br>Likelihood of reactions                                   | No available distribution | <i>E. coli</i> [8]<br><i>Ostreococcus</i> [9]<br><i>Chlamydomonas reinhardtii</i> [8]                                                                           |
| <b>Benedict et al.</b> [10]   | Target metabolites<br>Likelihood of reactions                                   | KBase framework           | 21 bacterial species [10]                                                                                                                                       |
| <b>Mintz-Oron et al.</b> [11] | Target metabolites<br>Proteomic data                                            | No available distribution | <i>Arabidopsis thaliana</i> [11]                                                                                                                                |
| <b>Mirage</b> [12]            | Target metabolites<br>Taxonomic weights<br>Co-expression transcriptomic weights | Matlab                    | <i>Cyanobacteria</i> [12]                                                                                                                                       |
| <b>Growmatch</b> [13]         | Targeted metabolites<br>Growth/no growth data                                   | Matlab                    | <i>Methanosarcina acetivorans</i> [14]<br><i>Saccharomyces cerevisiae</i> [15]                                                                                  |
| <b>OMNI</b> [16]              | Flux data                                                                       | Matlab & GAMS             | <i>E. coli</i> [16]                                                                                                                                             |

## References

1. Satish Kumar V, Dasika MS, Maranas CD. Optimization based automated curation of metabolic reconstructions. *BMC Bioinformatics*. 2007;8:212. Available from: <http://www.biomedcentral.com/1471-2105/8/212>.
2. Aggarwal S, Karimi IA, Reinaldi Ivan G. In silico modeling and evaluation of *Gordonia alkanivorans* for biodesulfurization. *Mol BioSyst*. 2013;9:2530–2540. Available from: <http://dx.doi.org/10.1039/C3MB70132H>.
3. Thiele I, Hyduke DR, Steeb B, Fankam G, Allen DK, Bazzani S, et al. A community effort towards a knowledge-base and mathematical model of the human pathogen *Salmonella Typhimurium* LT2. *BMC Systems Biology*. 2011;5(1):1–9. Available from: <http://dx.doi.org/10.1186/1752-0509-5-8>.
4. Milne CB, Eddy JA, Raju R, Ardekani S, Kim PJ, Senger RS, et al. Metabolic network reconstruction and genome-scale model of butanol-producing strain *Clostridium beijerinckii* NCIMB 8052. *BMC Systems Biology*. 2011;5(1):1–15. Available from: <http://dx.doi.org/10.1186/1752-0509-5-130>.
5. Thiele I, Vlassis N, Fleming RMT. fastGapFill: efficient gap filling in metabolic networks. *Bioinformatics (Oxford, England)*. 2014 Sep;30(17):2529–2531. Available from: <http://dx.doi.org/10.1093/bioinformatics/btu321>.
6. Prigent S, Collet G, Dittami SM, Delage L, Ethis de Corny F, Dameron O, et al. The genome-scale metabolic network of *Ectocarpus siliculosus* (EctoGEM): a resource to study brown algal physiology and beyond. *The Plant Journal*. 2014;80(2):367–381. Available from: <http://dx.doi.org/10.1111/tpj.12627>.
7. Dittami SM, Barbeyron T, Boyen C, Cambefort J, Collet G, Delage L, et al. Genome and metabolic network of “*Candidatus Phaeomarinobacter ectocarpi*” Ec32, a new candidate genus of Alphaproteobacteria frequently associated with brown algae. *Frontiers in Genetics*. 2014;5(241). Available from: [http://www.frontiersin.org/systems\\_biology/10.3389/fgene.2014.00241/abstract](http://www.frontiersin.org/systems_biology/10.3389/fgene.2014.00241/abstract).
8. Christian N, May P, Kempa S, Handorf T, Ebenhöf O. An integrative approach towards completing genome-scale metabolic networks. *Molecular BioSystems*. 2009 Dec;5(12):1889–903. Available from: <http://pubs.rsc.org/en/content/articlehtml/2009/mb/b915913b>.
9. Krumholz EW, Yang H, Weisenhorn P, Henry CS, Libourel IGL. Genome-wide metabolic network reconstruction of the picoalga *Ostreococcus*. *Journal of Experimental Botany*. 2011; Available from: <http://jxb.oxfordjournals.org/content/early/2011/12/28/jxb.err407.abstract>.
10. Benedict MN, Mundy MB, Henry CS, Chia N, Price ND. Likelihood-Based Gene Annotations for Gap Filling and Quality Assessment in Genome-Scale Metabolic Models. *PLoS Comput Biol*. 2014 10;10(10):e1003882. Available from: <http://dx.doi.org/10.1371/journal.pcbi.1003882>.
11. Mintz-Oron S, Meir S, Malitsky S, Ruppin E, Aharoni A, Shlomi T. Reconstruction of *Arabidopsis* metabolic network models accounting for subcellular compartmentalization and tissue-specificity. *Proceedings of the National Academy of Sciences*. 2012;109(1):339–344. Available from: <http://www.pnas.org/content/109/1/339.abstract>.

12. Vitkin E, Shlomi T. MIRAGE: a functional genomics-based approach for metabolic network model reconstruction and its application to cyanobacteria networks. *Genome biology*. 2012;13(11):R111. Available from: <http://dx.doi.org/10.1186/gb-2012-13-11-r111>.
13. Kumar VS, Maranas CD. GrowMatch: An Automated Method for Reconciling In Silico In Vivo Growth Predictions. *PLoS Comput Biol*. 2009 03;5(3):e1000308. Available from: <http://dx.doi.org/10.1371/journal.pcbi.1000308>.
14. Satish Kumar V, Ferry JG, Maranas CD. Metabolic reconstruction of the archaeon methanogen *Methanosarcina Acetivorans*. *BMC Systems Biology*. 2011;5(1):1–10. Available from: <http://dx.doi.org/10.1186/1752-0509-5-28>.
15. Zomorodi AR, Maranas CD. Improving the iMM904 *S. cerevisiae* metabolic model using essentiality and synthetic lethality data. *BMC Systems Biology*. 2010;4(1):1–15. Available from: <http://dx.doi.org/10.1186/1752-0509-4-178>.
16. Herrgård MJ, Fong SS, Palsson BØ. Identification of Genome-Scale Metabolic Network Models Using Experimentally Measured Flux Profiles. *PLoS Comput Biol*. 2006 07;2(7):e72. Available from: <http://dx.plos.org/10.1371/journal.pcbi.0020072>.
